# Supplementary material
Source: PubMed Central journal article supplement (PMC3948120)
Supplement: jcbfm2013215x1.pdf [file jcbfm2013215x1.pdf]

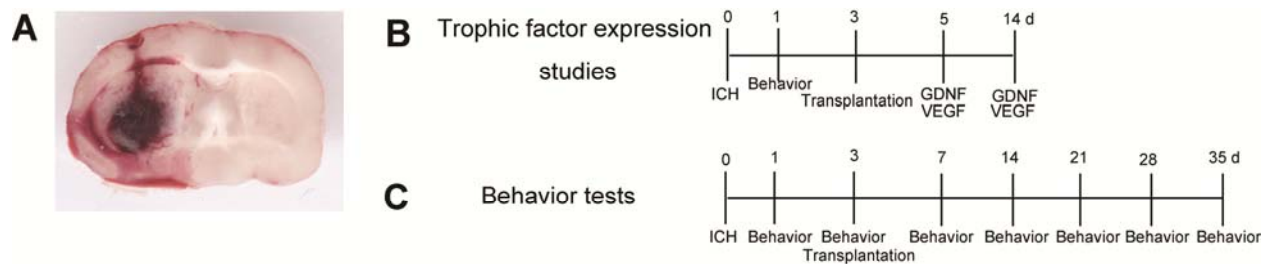

**Supplementary Figure 1.** Experimental procedure *in vivo*. **(A)** Photomicrograph of representative coronal section of a mouse brain illustrating the location of a hematoma produced by intrastriatal injection of autologous blood. **(B, C)** Timeline for mice that were treated with neural stem cell transplantation 3 days after intracerebral hemorrhage (ICH) and were used for trophic factor expression studies **(B)** and behavioral analysis **(C)**. GDNF, glial cell-derived neurotrophic factor; VEGF, vascular endothelial growth factor.
